# Supplementary material
Source: Springer Nature journal article supplement (https://www.springermedizin.de/resource/supplementary/13045_2009_77_MOESM6_ESM.pdf/9660612)

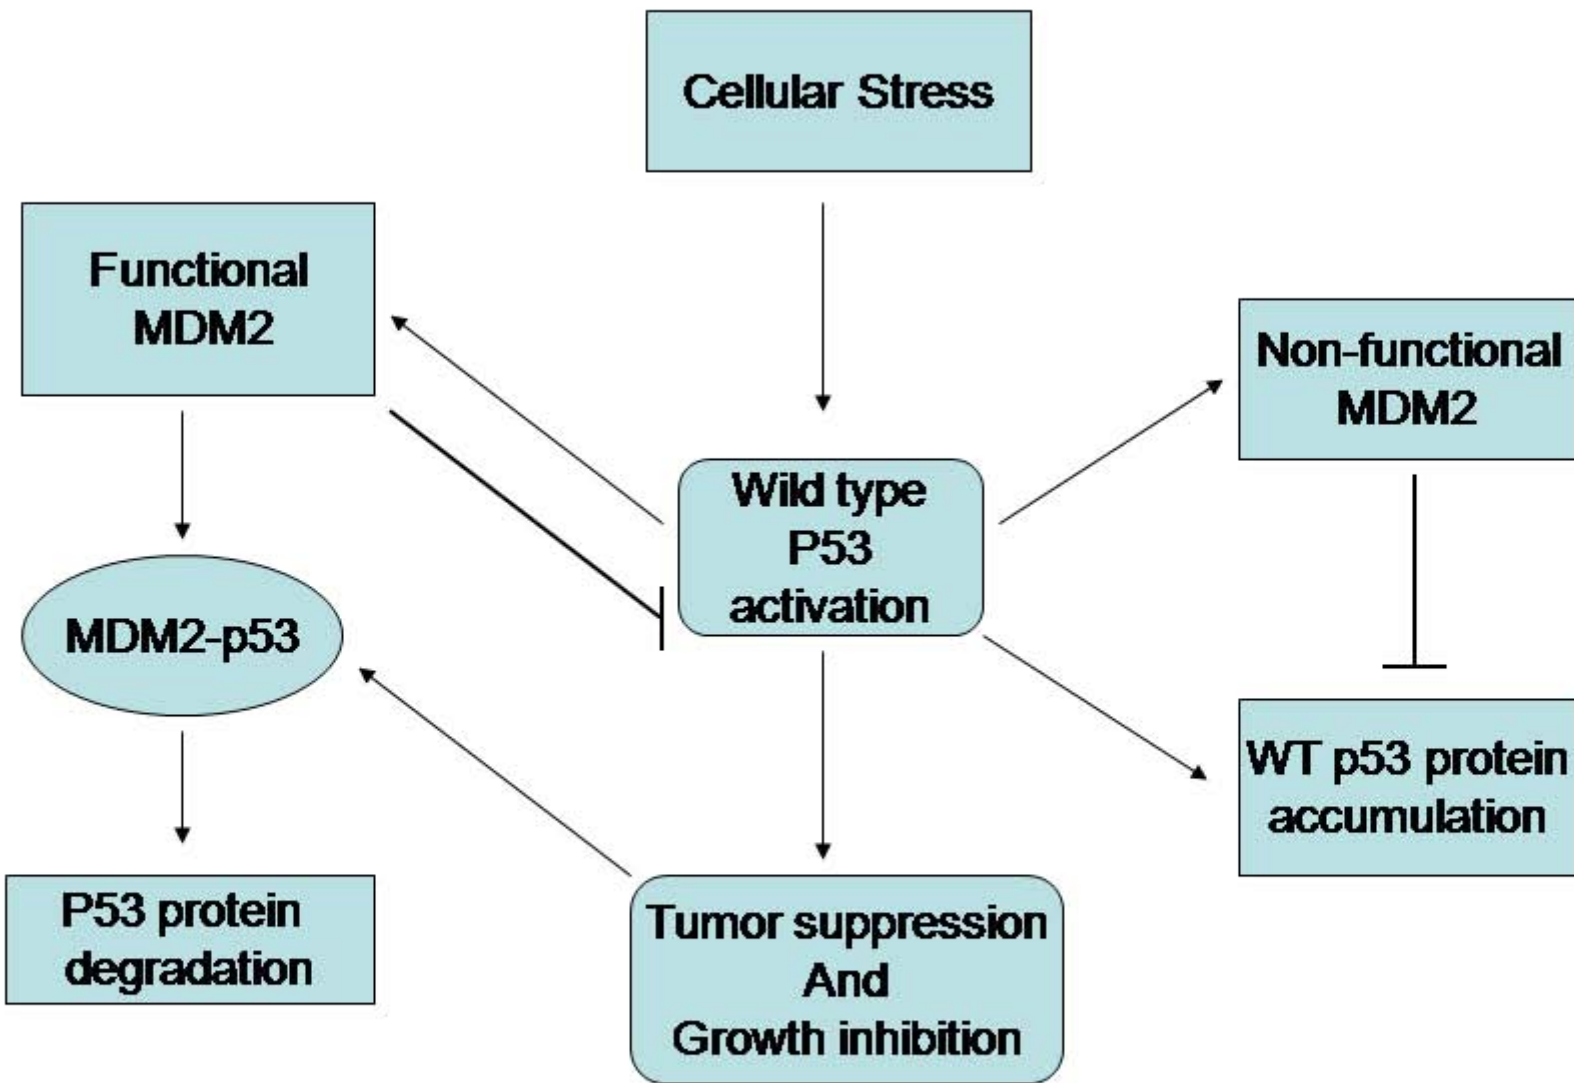

Supplement: MOESM6 [file 9660612]
